# Supplementary material for: Spatial arrangement of the whiskers of harbor seals (Phoca vitulina) compared with whisker arrangements of house mice (Mus musculus) and brown rats (Rattus norvegicus)
Source: PubMed Central journal article supplement (PMC11634035; doi:10.1242/jeb.247545), 2024-11-27
Supplement: jexbio-227-247545-s1.pdf [file jexbio-227-247545-s1.pdf]

**Table S1.** Best fit equations for radial basepoint coordinate and angles of emergence by individual animal, along with combined equations across animals. *Abbreviations:* Prm: Parameter; (n): number of whiskers.

| Prm                                                                                                                                                                                   | Animal (n)      | Coefficients   |                |                | 95% Confidence Intervals |                        |                     | Adj. R <sup>2</sup> |                  |                      |       |
|---------------------------------------------------------------------------------------------------------------------------------------------------------------------------------------|-----------------|----------------|----------------|----------------|--------------------------|------------------------|---------------------|---------------------|------------------|----------------------|-------|
|                                                                                                                                                                                       |                 | C <sub>1</sub> | C <sub>2</sub> | C <sub>3</sub> | C <sub>1</sub>           | C <sub>2</sub>         | C <sub>3</sub>      |                     |                  |                      |       |
| 1                                                                                                                                                                                     | r <sub>bp</sub> | Seal 1 (56)    | N/A            | -0.42203       | 36.525                   | N/A                    | [-0.4729, -0.3711]  | [35.5827, 37.4682]  | 0.833            |                      |       |
|                                                                                                                                                                                       |                 | Seal 2 (62)    | 0.003283       | -0.53157       | 35.899                   | [4.970e-04, 0.0060702] | [-0.5945, -0.4687]  | [34.6273, 37.1707]  | 0.838            |                      |       |
|                                                                                                                                                                                       |                 | Seal 3 (53)    | 0.004162       | -0.61645       | 35.195                   | [0.001343, 0.006980]   | [-0.6877, -0.5452]  | [33.8951, 36.4957]  | 0.882            |                      |       |
|                                                                                                                                                                                       |                 | Combined (171) | N/A            | -0.4905        | 36.489                   | N/A                    | [-0.5236, -0.4574]  | [35.8804, 37.0967]  | 0.846            |                      |       |
| Final equation for radial basepoint coordinate: $r_{bp} = c_1\theta_{bp}^2 + c_2\theta_{bp} + c_3$ , where $r_{bp}$ is in millimeters and $\theta_{bp}$ is in degrees.                |                 |                |                |                |                          |                        |                     |                     |                  |                      |       |
| 2                                                                                                                                                                                     | $\theta_w$      | Seal 1 (56)    | N/A            | -0.972         | 1.815                    | 133.02                 | N/A                 | [-1.1597, -0.7849]  | [1.6454, 1.9849] | [129.9012, 136.1351] | 0.903 |
|                                                                                                                                                                                       |                 | Seal 2 (62)    | N/A            | -1.141         | 1.647                    | 138.42                 | N/A                 | [-1.3181, -0.9631]  | [1.4731, 1.8199] | [135.3208, 141.5222] | 0.889 |
|                                                                                                                                                                                       |                 | Seal 3 (53)    | 0.0504         | -0.749         | 1.856                    | 133.85                 | [0.0394, 0.0615]    | [-0.9656, -0.5319]  | [1.6882, 2.0236] | [129.8400, 137.8607] | 0.923 |
|                                                                                                                                                                                       |                 | Combined (171) | N/A            | -1.100         | 1.770                    | 138.42                 | N/A                 | [-1.2346, -0.9655]  | [1.6481, 1.8927] | [136.1603, 140.6733] | 0.854 |
| Final equation for azimuthal angle of emergence: $\theta_w = c_1\phi_{bp}^2 + c_2\phi_{bp} + c_3\theta_{bp} + c_4$ , where $\theta_w$ , $\phi_{bp}$ and $\theta_{bp}$ are in degrees. |                 |                |                |                |                          |                        |                     |                     |                  |                      |       |
| 3                                                                                                                                                                                     | $\phi_w$        | Seal 1 (56)    | N/A            | 1.700          | N/A                      | -23.345                | N/A                 | [1.5198, 1.8800]    | N/A              | [-26.3311, -20.3596] | 0.867 |
|                                                                                                                                                                                       |                 | Seal 2 (62)    | N/A            | 1.449          | N/A                      | -21.738                | N/A                 | [1.3460, 1.5526]    | N/A              | [-23.4949, -19.9809] | 0.928 |
|                                                                                                                                                                                       |                 | Seal 3 (53)    | 0.0127         | 1.730          | N/A                      | -19.799                | [0.003515, 0.02179] | [1.5494, 1.9098]    | N/A              | [-22.9582, -16.6397] | 0.882 |
|                                                                                                                                                                                       |                 | Combined (171) | N/A            | 1.570          | N/A                      | -20.928                | N/A                 | [1.4802, 1.6597]    | N/A              | [-22.3935, -19.4632] | 0.875 |
| Final equation for elevation angle of emergence: $\phi_w = c_1\phi_{bp}^2 + c_2\phi_{bp} + c_3\theta_{bp} + c_4$ , where $\phi_w$ , $\phi_{bp}$ , and $\theta_{bp}$ are in degrees.   |                 |                |                |                |                          |                        |                     |                     |                  |                      |       |
| 4                                                                                                                                                                                     | $\zeta_w$       | Seal 1 (56)    | N/A            | -1.350         | 1.573                    | -23.663                | N/A                 | [-1.7195, -0.9803]  | [1.2382, 1.9078] | [-29.8110, -17.5155] | 0.693 |
|                                                                                                                                                                                       |                 | Seal 2 (62)    | N/A            | -1.565         | 1.753                    | -23.714                | N/A                 | [-1.8397, -1.2893]  | [1.4836, 2.0214] | [-28.5220, -18.9053] | 0.818 |
|                                                                                                                                                                                       |                 | Seal 3 (53)    | N/A            | -1.732         | 2.308                    | -28.091                | N/A                 | [-2.1166, -1.3482]  | [1.9916, 2.6238] | [-34.2624, -21.9194] | 0.840 |
|                                                                                                                                                                                       |                 | Combined (171) | N/A            | -1.540         | 1.866                    | -24.447                | N/A                 | [-1.7351, -1.3448]  | [1.6882, 2.0429] | [-27.7197, -21.1746] | 0.784 |
| Final equation for twist angle of emergence: $\zeta_w = c_1\phi_{bp}^2 + c_2\phi_{bp} + c_3\theta_{bp} + c_4$ , where $\zeta_w$ , $\phi_{bp}$ , and $\theta_{bp}$ are in degrees.     |                 |                |                |                |                          |                        |                     |                     |                  |                      |       |
